# Supplementary material
Source: PubMed Central journal article supplement (PMC3670396)
Supplement: 1306849110_pnas.201306849SI.pdf [file 1306849110_pnas.201306849SI.pdf]

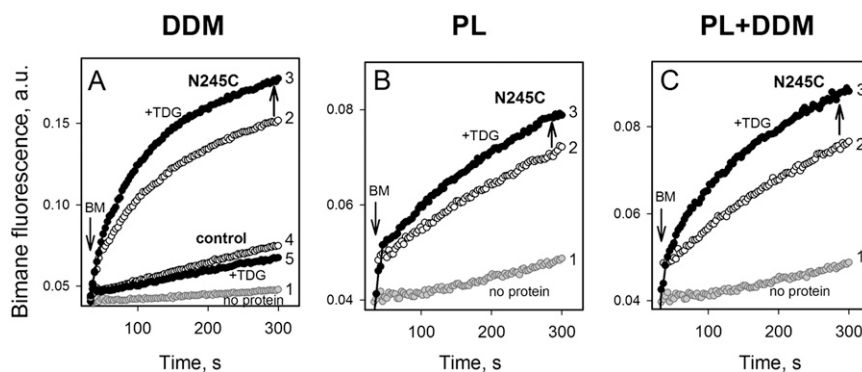

**Fig. 54.** Alkylation of a Cys residue introduced in place of Asn245 in the periplasmic pathway of mutant G370W. The highly reactive/accessible native Cys148 in the mutant was replaced with Met. Addition of 1  $\mu\text{M}$  BM (at 30 s) is indicated by an inverted arrow. Traces were recorded as a function of time at excitation and emission wavelengths of 380 and 465 nm, respectively, with 0.5  $\mu\text{M}$  of protein solubilized in DDM (A), reconstituted into proteoliposomes (B), or with the same proteoliposomes dissolved in DDM (C). In each panel, trace 1 was recorded with no protein added, and traces 2 and 3 represent labeling of Cys245 in the absence of sugar or after addition of 6 mM TDG, respectively. Labeling of a control protein with no introduced Cys (G370W LacY) is shown on left panel (traces 4 and 5 indicate labeling in the absence or presence of TDG, respectively).

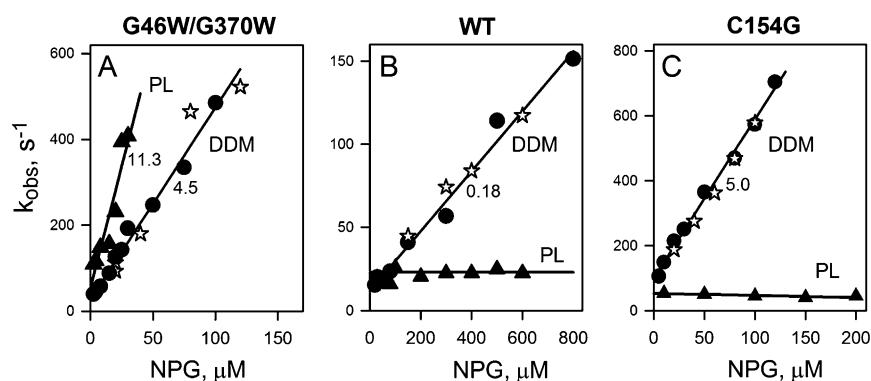

**Fig. 55.** Kinetics of sugar binding to G46W/G370W LacY. Stopped-flow data for mutant G46W/G370W (A) are compared with previous findings from similar experiments (1) with WT (B) and C154G mutant (C). Rates of NPG binding estimated from stopped-flow experiments (as shown in Fig. 5 A and B) are plotted vs. NPG concentration and fitted with a linear equation (as shown in Fig. 5C) for protein in DDM ( $\bullet$ ), reconstituted into proteoliposomes (PL;  $\blacktriangle$ ), and for the same proteoliposomes dissolved in DDM ( $\star$ ). Linear fits to the data are shown as black lines, with  $k_{\text{on}}$  values given near the lines. Kinetic parameters for NPG binding to mutant G46W/G370W in DDM and in proteoliposomes (data in parenthesis) are:  $k_{\text{off}} = 27$  (54)  $\text{s}^{-1}$ ,  $k_{\text{on}} = 4.5$  (11.3)  $\mu\text{M}^{-1}\text{s}^{-1}$ , and  $K_{\text{d}} = 6.0$  (4.8)  $\mu\text{M}$ . WT LacY and C154G mutants reconstituted into proteoliposomes bind NPG at rates that are independent of NPG concentration ( $k_{\text{obs}} = 20$  and  $50 \text{ s}^{-1}$ , respectively).

1. Smirnova I, Kasho V, Sugihara J, Kaback HR (2011) Opening the periplasmic cavity in lactose permease is the limiting step for sugar binding. *Proc Natl Acad Sci USA* 108(37): 15147–15151.

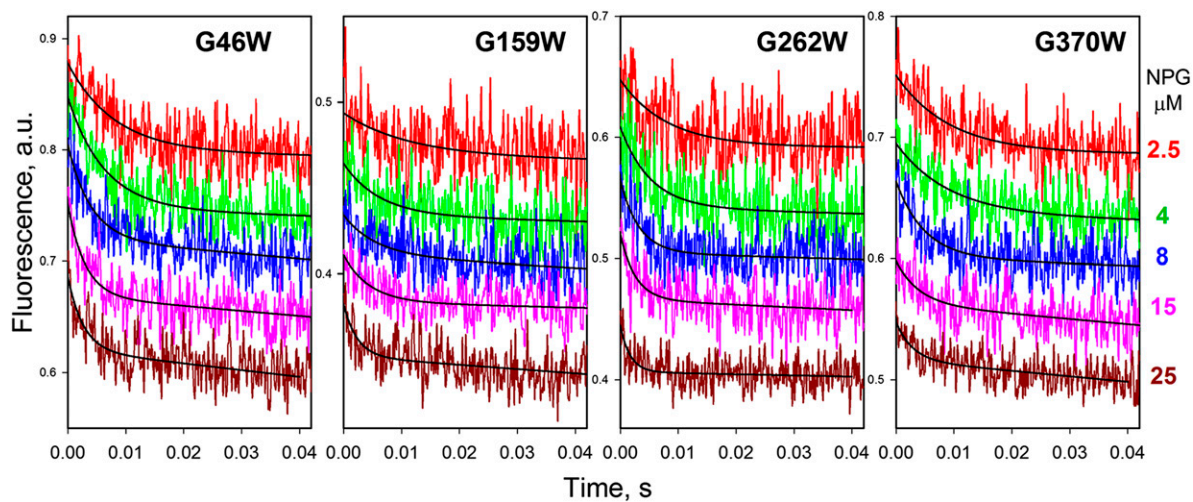

**Fig. S6.** NPG binding to reconstituted LacY mutants with single G→W replacements. Stopped-flow traces of Trp fluorescence change (excitation and emission wavelengths, 295 and 340 nm, respectively) were recorded after mixing of NPG (at final concentrations indicated), with each purified mutant (0.5 μM) reconstituted into proteoliposomes. Sugar binding rates ( $k_{obs}$ ) were estimated from single exponential fits (black lines) and plotted vs. NPG concentrations (shown as triangles in Fig. 6).

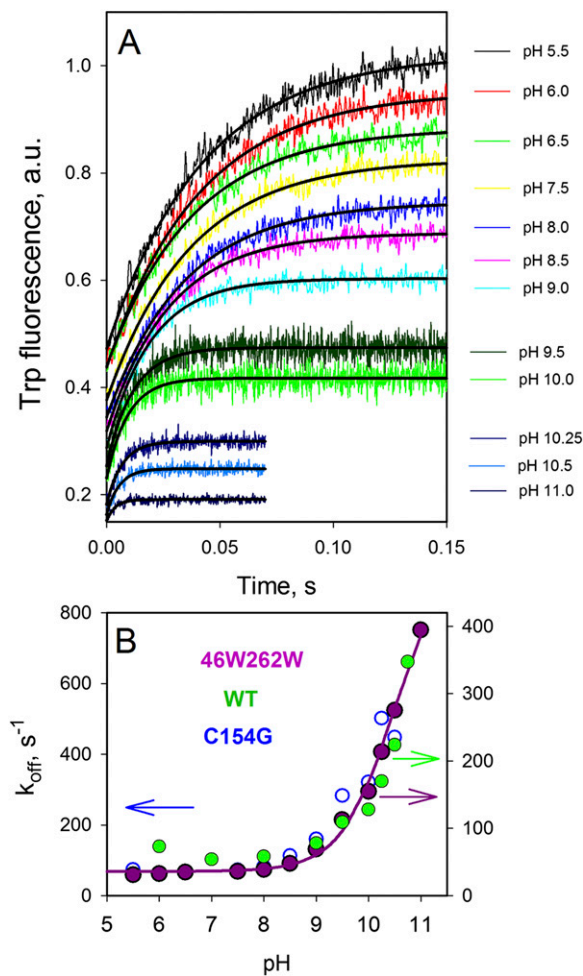

**Fig. S7.** Effect of pH on NPG dissociation rate ( $k_{off}$ ) for mutant G46W/G262W. (A) Stopped-flow traces showing the increase in Trp fluorescence after displacement of bound NPG by excess TDG (Trp→NPG FRET) at given pH values. Protein preincubated with NPG was mixed with TDG, and the fluorescence change was recorded at excitation and emission wavelengths 295 and 340, respectively. Final concentrations were protein, 0.8–1.6  $\mu$ M; NPG, 0.2–0.4 mM; and TDG, 30–60 mM. Buffers (50 mM) containing 0.02% DDM were citrate/ $\text{NaP}_i$  (pH 5.5–6.5);  $\text{NaP}_i$  (pH 7.5–8.0); *N*-(1,1-dimethyl-2-hydroxyethyl)-3-amino-2-hydroxypropanesulfonic acid/ $\text{NaOH}$  (pH 8.0–9.5); and 3-(cyclohexylamino)-1-propanesulfonic acid/ $\text{NaOH}$  (pH 9.5–11.0). Single exponential fits are shown as solid black lines. Amplitudes of the fluorescence changes (expressed as percentage of final level) decreased from 54% at pH 5.5 to 20% at pH 11.0. Displacement rates ( $k_{off}$ ) estimated from (A) are plotted as a function of pH (B) in comparison with previous data for WT LacY (green circles) and mutant C154G (open circles) (1). Vertical axis are as follows (arrows): right axis, G46W/G262W, purple, and WT LacY, green; left axis, C154G, blue. The solid line represents a sigmoidal fit (SigmaPlot 10.0) with an estimated  $\text{pK}_a$  of  $\sim 10.5$ .

1. Smirnova IN, Kasho VN, Sugihara J, Choe JY, Kaback HR (2009) Residues in the  $\text{H}^+$  translocation site define the  $\text{pK}_a$  for sugar binding to LacY. *Biochemistry* 48(37):8852–8860.
